# Supplementary material for: Public awareness of the association between human papillomavirus and oropharyngeal cancer
Source: PubMed Central journal article supplement (PMC8565482; doi:10.1093/eurpub/ckab081), 2021-06-03
Supplement: ckab081_supplementary_data.pdf [file ckab081_supplementary_data.pdf]

## Questionnaire about throat cancer

1. What things do you think affect a person's chance of throat cancer? If you cannot think of any, please "don't know" in the box below.

|  |
|--|
|  |
|--|

2. Which of the following are common factors for an increased risk of getting throat cancer?

|                                              | Yes                   | No                    | Not sure              |
|----------------------------------------------|-----------------------|-----------------------|-----------------------|
| Excessive alcohol consumption                | <input type="radio"/> | <input type="radio"/> | <input type="radio"/> |
| Smoking                                      | <input type="radio"/> | <input type="radio"/> | <input type="radio"/> |
| Chewing of tobacco                           | <input type="radio"/> | <input type="radio"/> | <input type="radio"/> |
| Chewing of Betel leaf/ Catchu and areca nuts | <input type="radio"/> | <input type="radio"/> | <input type="radio"/> |
| Marijuana use                                | <input type="radio"/> | <input type="radio"/> | <input type="radio"/> |
| Poor oral hygiene                            | <input type="radio"/> | <input type="radio"/> | <input type="radio"/> |
| Herpes simplex virus infection               | <input type="radio"/> | <input type="radio"/> | <input type="radio"/> |
| Human papillomavirus infection               | <input type="radio"/> | <input type="radio"/> | <input type="radio"/> |
| Family history of cancer                     | <input type="radio"/> | <input type="radio"/> | <input type="radio"/> |
| Fruit and vegetable consumption              | <input type="radio"/> | <input type="radio"/> | <input type="radio"/> |
| Sun exposure                                 | <input type="radio"/> | <input type="radio"/> | <input type="radio"/> |

3. There are many warning signs and symptoms of throat cancer. Please name as many as you can. If you cannot think of any, please type "don't know" in the box below.

|  |
|--|
|  |
|--|

4. Before today had you ever heard of HPV (human papillomavirus)?

- Yes
- No
- Not sure

HPV is the virus that causes cervical cancer.

5. Please read the following statements and say whether you think each one is true or false

|                                          | True                  | False                 | Not sure              |
|------------------------------------------|-----------------------|-----------------------|-----------------------|
| HPV is very rare                         | <input type="radio"/> | <input type="radio"/> | <input type="radio"/> |
| HPV can be passed on during sex          | <input type="radio"/> | <input type="radio"/> | <input type="radio"/> |
| HPV can be passed on during oral sex     | <input type="radio"/> | <input type="radio"/> | <input type="radio"/> |
| HPV can cause HIV/AIDS                   | <input type="radio"/> | <input type="radio"/> | <input type="radio"/> |
| There is a vaccine against the virus HPV | <input type="radio"/> | <input type="radio"/> | <input type="radio"/> |

6. Were you aware that the virus HPV (human papillomavirus) is a risk factor for throat cancer?

- Yes
- No

Finally, a number of background questions follow below.

**7. Do you smoke?**

- Yes, I'm a current smoker
- Yes, I have smoked in the past
- No

**8. How many cigarettes do you smoke per day?**

- Less than 10 per day
- 10 - 19 per day
- 20 - 35 per day
- 35 or more per day

**9. How many units of alcohol do you consume in the average week?**

- 1-7
- 8-14
- 15-21
- More than 21
- I never drink alcohol
